# Supplementary material for: Preliminary Efficacy and Safety of Reishi & Privet Formula on Quality of Life Among Non–Small Cell Lung Cancer Patients Undergoing Chemotherapy: A Randomized Placebo-Controlled Trial
Source: PubMed Central journal article supplement — Integr Cancer Ther. 2020 Aug 25;19:1534735420944491. doi: 10.1177/1534735420944491 (PMC7450289; doi:10.1177/1534735420944491), 2020-08-25
Supplement: 4_Reishi_appendix_1_April_24_2020_Clean.pdf [file 4_Reishi_appendix_1_April_24_2020_Clean.pdf]

List of Participating Sites:

| <b>City, Country</b> | <b>Site Name</b>                                                                      | <b>IRB Number</b> |
|----------------------|---------------------------------------------------------------------------------------|-------------------|
| Beijing, China       | Guang An Men Hospital*                                                                | 2015EC117-05      |
| Liuzhou, China,      | Liuzhou Worker's Hospital                                                             | PJ201644          |
| Shenyang, China      | Liaoning Cancer Hospital                                                              | 20170101          |
| Liuzhou, China       | Liuzhou People's Hospital                                                             | 2016-022-01       |
| Shaoguan, China      | Yuebei People's Hospital                                                              | Y-2017-02         |
| Yibin, China         | Yibin Second People's Hospital                                                        | 2017-002-01       |
| Harbin, China        | Harbin Medical University Cancer Hospital                                             | 2016-23           |
| Hengyang, China      | The First Affiliated Hospital of University of South China                            | (2016)(14-01)     |
| Beijing, China       | Beijing Cancer Hospital                                                               | 2016YW43          |
| Shenyang, China      | The First Affiliated Hospital of Liaoning University of Traditional Chinese Medicine* | 2016CS(YW)-009-01 |
| Hangzhou, China      | Affiliated Hangzhou First People's Hospital*                                          | 2016(015)-02      |
| Changsha, China      | Hunan Cancel Hospital*                                                                | 2017(66)          |

\*Sites that were initiated but did not enter any patients in the screening process.
